# Supplementary material
Source: PubMed Central journal article supplement (PMC4221190)
Supplement: NIHMS569677-supplement-Supplementary_Figures.pdf [file NIHMS569677-supplement-Supplementary_Figures.pdf]

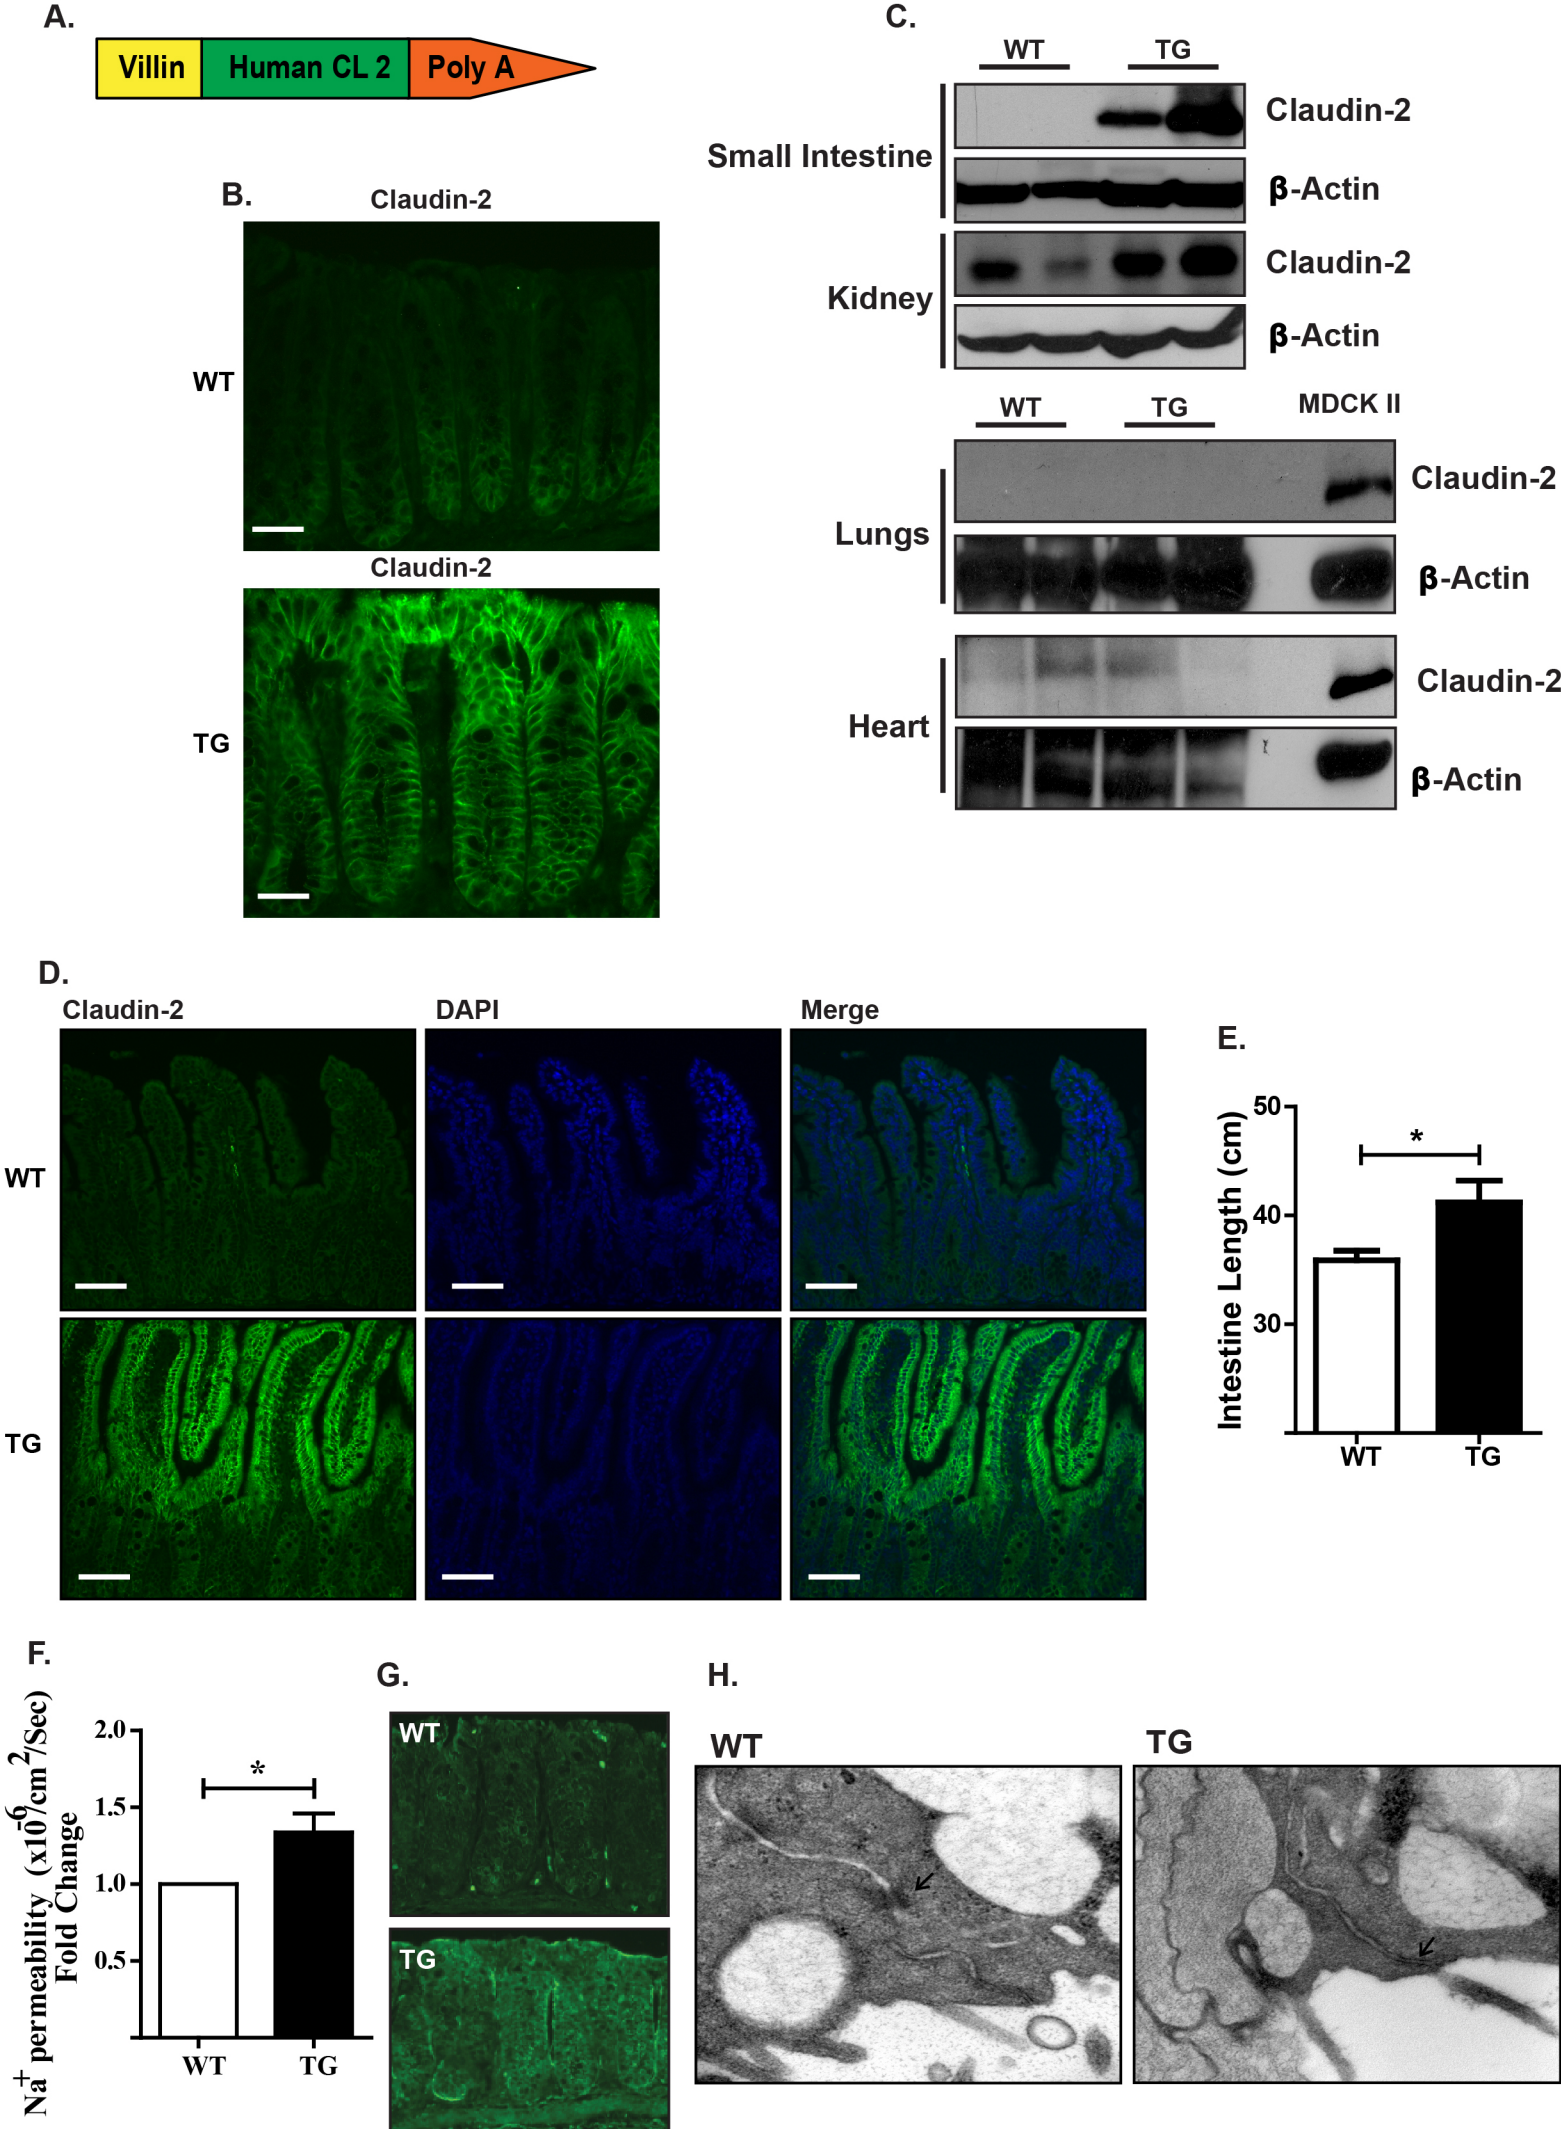

Sup. Figure 1

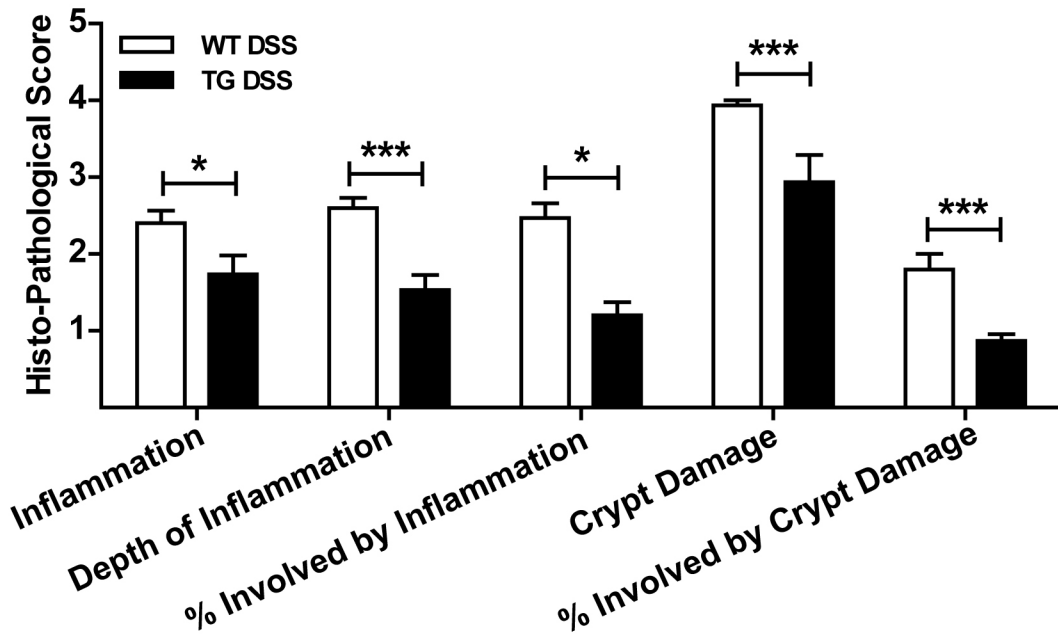

Sup. Figure 2

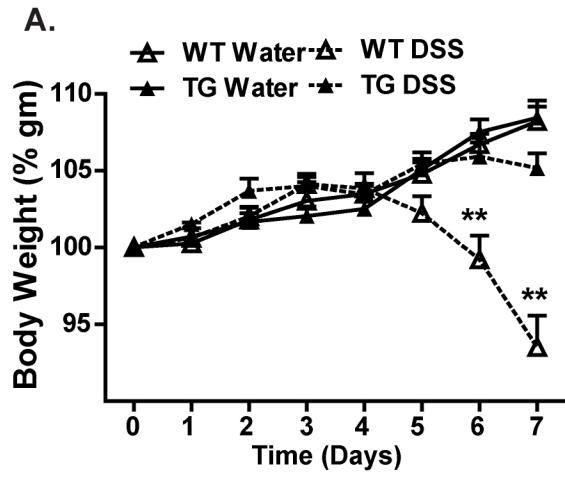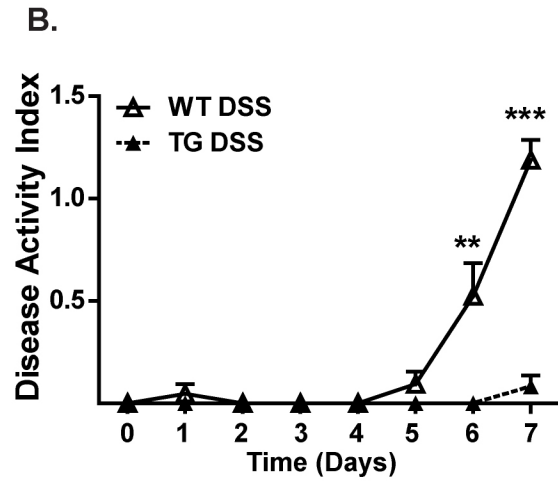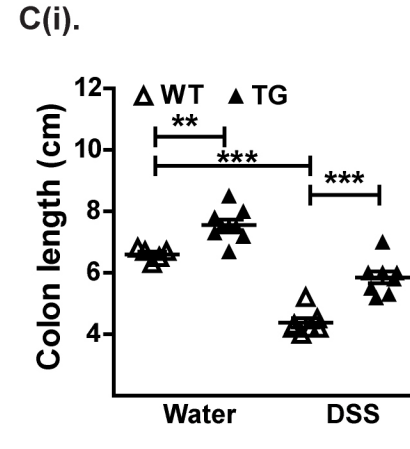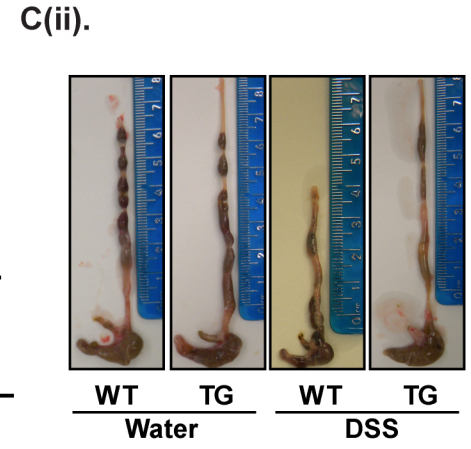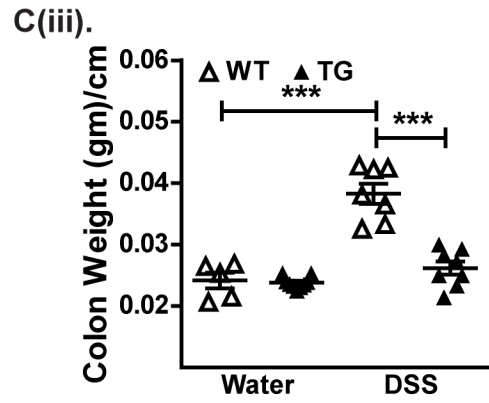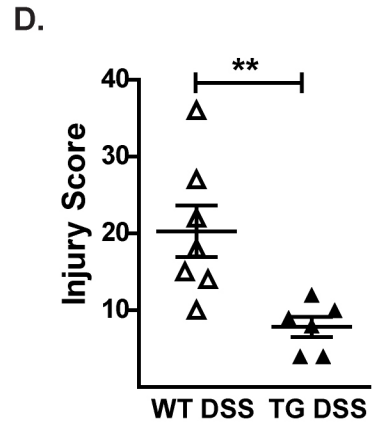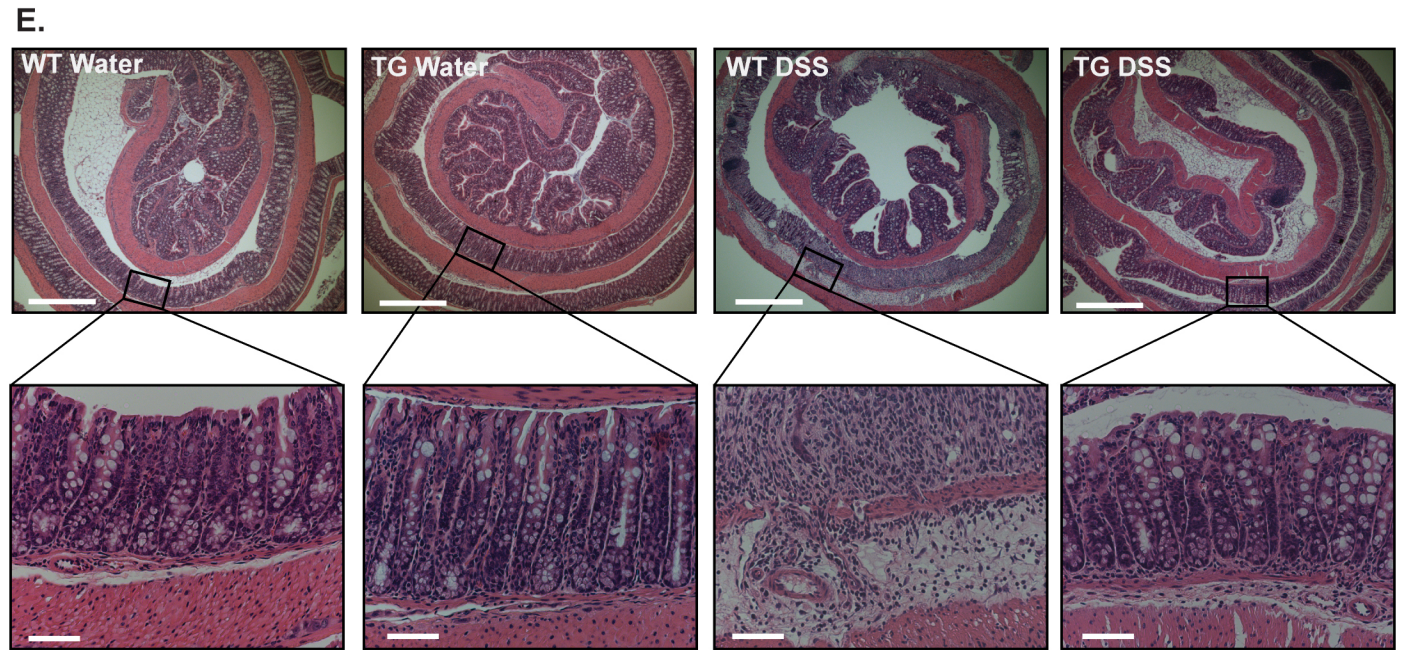

Sup Figure 3



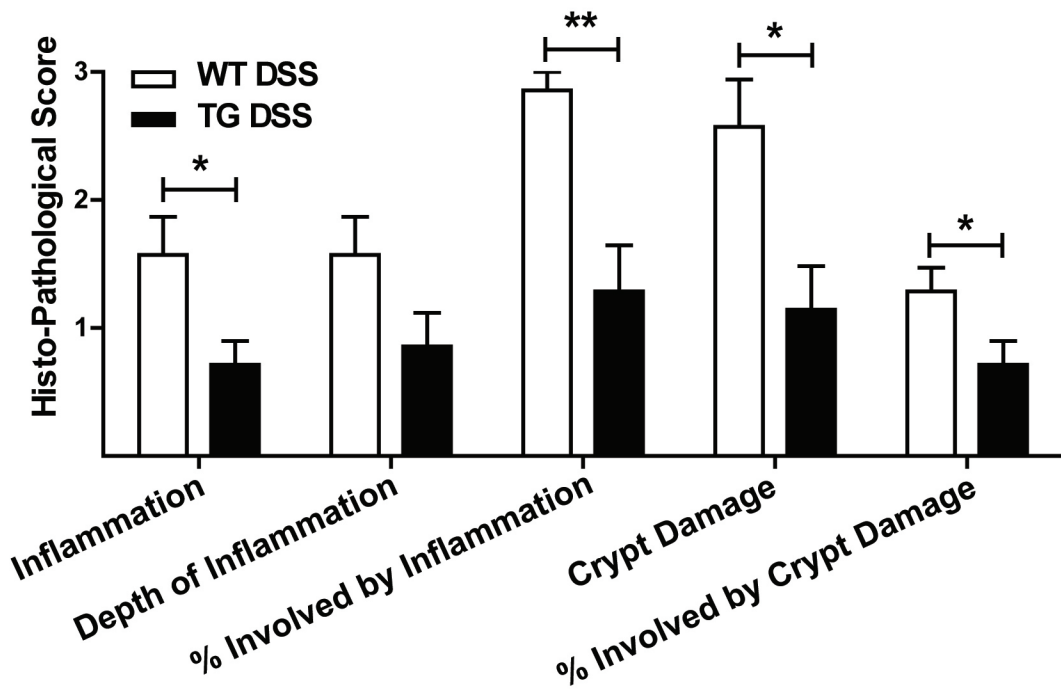

Sup Figure 4



A.

| Gene Symbol | WT- DSS vs WT- Water |          | TG- DSS vs WT- DSS |          |
|-------------|----------------------|----------|--------------------|----------|
|             | Fold Change          | p value  | Fold Change        | p value  |
| Mki67ip     | 1.295613 Down        | 0.043102 | 1.530266 Up        | 0.001082 |
| Nek2        | 2.581508 Down        | 0.044292 | 2.952754 Up        | 0.025555 |
| Myb         | 3.147719 Down        | 0.029708 | 3.206840 Up        | 0.030501 |
| Lgr5        | 4.035135 Down        | 0.000099 | 2.246284 Up        | 0.010863 |
| Aurkb       | 2.673147 Down        | 0.021344 | 2.641883 Up        | 0.024074 |
| Map2k6      | 2.157938 Down        | 0.015978 | 2.136865 Up        | 0.023588 |
| Sox9        | 2.305163 Down        | 0.031496 | 2.217972 Up        | 0.041557 |
| Klf11       | 1.280752 Up          | 0.036516 | 1.321644 Down      | 0.018048 |
| Thbs4       | 3.479765 Down        | 0.046747 | 3.010650 Up        | 0.074350 |
| Pbk         | 2.609706 Down        | 0.039447 | 3.059469 Up        | 0.024803 |
| Racgap1     | 2.643641 Down        | 0.034685 | 2.694593 Up        | 0.030821 |
| D2Ert750e   | 2.803629 Down        | 0.010281 | 2.985298 Up        | 0.004695 |
| Mastl       | 2.394336 Down        | 0.028074 | 2.647863 Up        | 0.011156 |
| Dpp4        | 3.029217 Down        | 0.029179 | 2.805923 Up        | 0.045031 |
| Foxa2       | 2.479030 Down        | 0.005101 | 2.440536 Up        | 0.008219 |
| Cenpe       | 2.051138 Down        | 0.059996 | 2.715085 Up        | 0.015959 |
| Ccna2       | 2.829836 Down        | 0.051639 | 2.903736 Up        | 0.049545 |
| Ceacam2     | 2.692584 Down        | 0.016621 | 3.270824 Up        | 0.009319 |
| Mki67       | 2.805921 Down        | 0.048528 | 3.098565 Up        | 0.035351 |
| Ccnb2       | 3.434765 Down        | 0.019629 | 3.470765 Up        | 0.018249 |

B.

| Gene Symbol | WT- DSS vs WT- Water |          | TG- DSS vs WT- DSS |          |
|-------------|----------------------|----------|--------------------|----------|
|             | Fold Change          | p value  | Fold Change        | p value  |
| Lrp1        | 2.002646 Up          | 0.023625 | 1.887311 Down      | 0.047300 |
| Osm         | 2.389864 Up          | 0.024789 | 2.357085 Down      | 0.026803 |
| Nos2        | 7.979631 Up          | 0.001584 | 3.631399 Down      | 0.084899 |
| Ccl5        | 4.143839 Up          | 0.000618 | 3.983609 Down      | 0.000635 |
| Socs3       | 5.521755 Up          | 0.013278 | 2.478286 Down      | 0.166513 |
| Tnfaip2     | 5.140316 Up          | 0.018625 | 3.995267 Down      | 0.063107 |
| Ppp3cc      | 2.166947 Up          | 0.009251 | 1.812614 Down      | 0.017459 |
| Osmr        | 5.525138 Up          | 0.023146 | 3.720754 Down      | 0.097304 |
| Lrp12       | 2.170096 Up          | 0.053851 | 2.107346 Down      | 0.062607 |
| Tnf         | 2.910118 Up          | 0.000251 | 1.941992 Down      | 0.007960 |
| Il1a        | 13.859118 Up         | 0.011922 | 10.754819 Down     | 0.023408 |
| Il1b        | 16.838106 Up         | 0.004915 | 10.527126 Down     | 0.029448 |
| Tnfsf10     | 2.213331 Up          | 0.009596 | 1.526537 Down      | 0.096202 |
| Pdgfc       | 2.464203 Up          | 0.021026 | 2.844194 Down      | 0.019459 |
| Tlr2        | 2.420263 Up          | 0.016231 | 2.067795 Down      | 0.040621 |
| Tnfsf15     | 1.314933 Down        | 0.006492 | 1.145899 Up        | 0.082905 |
| Jun         | 1.522237 Up          | 0.031279 | 1.581441 Down      | 0.028557 |
| Tnfrsf23    | 3.999659             | 0.009334 | 3.013921 Down      | 0.045087 |
| Tnfsf13b    | 2.484678 Up          | 0.012467 | 2.352315 Down      | 0.039148 |
| Mmp13       | 27.260050 Up         | 0.002652 | 12.678573 Down     | 0.042207 |
| Mmp3        | 15.619005 Up         | 0.012345 | 4.425097 Down      | 0.133717 |

Isotype control IgG1

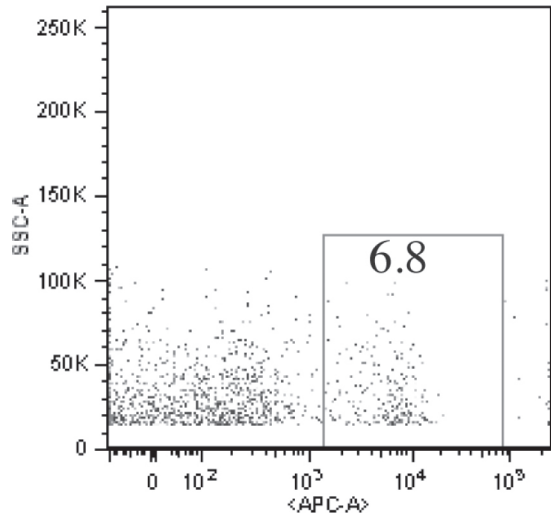

Anti-F4/80 antibody

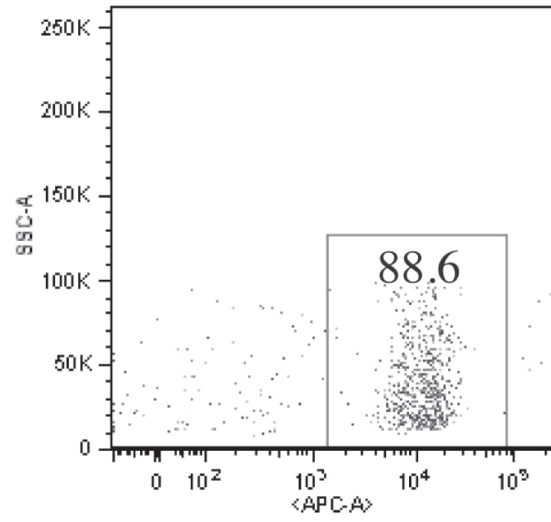

Supp Figure 6
