# Supplementary material
Source: PubMed Central journal article supplement (PMC4221190)
Supplement: NIHMS569677-supplement-Supplementary_Legends_and_Table.pdf [file NIHMS569677-supplement-Supplementary_Legends_and_Table.pdf]

## Supplemental figure legends

**Supplemental Figure 1:** *Villin-promoter-dependent claudin-2 overexpression is specific to the intestinal tract.* **A.** Cartoon depicting the claudin-2 transgene expression construct used to generate CI-2TG mice; **B.** Immunofluorescent analysis of claudin-2 expression in the colon of CI-2TG mice and WT-littermates; **C.** Immunoblot analysis to detect claudin-2 expression in organs known to express (small intestine and kidney) or not express (lung and heart) the Villin protein; **D.** Immunofluorescent analysis of claudin-2 expression in the intestine of CI-2TG mice and WT-littermates; **E.** Intestine length increases in CI-2TG mice versus WT-mice; **F.** Paracellular Na<sup>+</sup> flux (N# 5, \*p<0.05); **G.** Immunofluorescent imaging demonstrating higher retention of rectally administered FITC-dextran in the colonic epithelium of CI-2TG mice; and **H.** Representative electron microscopic images demonstrating tight junction ultrastructure in CI-2TG mice and WT littermates (N# 6).

**Supplemental Figure 2:** *Details of the histopathological analysis from DSS-treated CI-2TG mice and WT littermates.* Values are presented as mean} sem (n = 12). \*p<0.05, \*\*\*p<0.001 versus DSS-treated WT mice.

**Supplemental Figure 3:** *Protection of CI-2TG mice against DSS-colitis is not strain dependent.* CI-2TG mice backcrossed (more than 10 generations) to the C57BL/6 strain were used. To induce colitis, mice were provided with DSS (3% w/v) in the drinking water for 7 days. **(A).** Weight loss during the course of DSS administration; **(B).** Disease activity index; **C (i-ii).** Colon length (cm) in control and DSS-treated mice; and **C (iii).** Colon weight/cm ratio; **(D).** Cumulative injury scores from the colons of DSS-treated mice; **(E).** Representative H&E staining of colonic tissues from control and DSS-treated mice. Values are presented as mean} sem. \*\*p<0.01, \*\*\*p<0.001. Scale bars=500 or 50 μm.

**Supplemental Figure 4:** *Details of the histopathological analysis from WT and CI-2TG mice subjected to DSS-dependent chronic colitis.* Values are presented as mean} sem (N#12). \*p<0.05, \*\*\*p<0.001 versus DSS-treated WT mice.

**Supplemental Figure 5:** *Representative tables depicting the downregulation of genes associated with epithelial integrity and survival, and upregulation of genes associated with mucosal inflammation.* The DSS-treated WT-mice were compared with the control WT-mice that received regular drinking water and DSS-treated CI-2TG mice were compared with DSS-treated WT-mice. **(A).** Genes associated with proliferation/survival and epithelial integrity; and **(B).** Genes associated with mucosal inflammation. Fold change in expression and associated P-value is provided.

**Supplemental Figure 6:** *FACS analysis data demonstrating the % enrichment of F480+ cells is presented to demonstrate purity of the macrophages used in our in-vitro activation analysis.*

**Supplemental Table 1**

| Antibody                                         | Company                         | Address                          |
|--------------------------------------------------|---------------------------------|----------------------------------|
| Anti-Claudin-2                                   | Invitrogen Corp.                | San Francisco, CA, USA           |
| Anti-Claudin-3                                   | -do-                            | -do-                             |
| Anti-Claudin-4                                   | -do-                            | -do-                             |
| Anti-Occludin                                    | -do-                            | -do-                             |
| Anti-Zo-1                                        | -do-                            | -do-                             |
| Anti-Phospho-P65                                 | Cell Signaling Technology, Inc. | Danvers, MA, USA                 |
| Anti-P65                                         | -do-                            | -do-                             |
| Anti-Phospho-P38                                 | -do-                            | -do-                             |
| Anti-P38                                         | -do-                            | -do-                             |
| Anti-Phospho-AKT                                 | -do-                            | -do-                             |
| Anti-AKT                                         | -do-                            | -do-                             |
| Anti-Phospho-ERK1/2                              | -do-                            | -do-                             |
| Anti-ERK1/2                                      | -do-                            | -do-                             |
| Anti-Phospho-P65                                 | -do-                            | -do-                             |
| Anti-Phospho-STAT3                               | -do-                            | -do-                             |
| Anti-STAT3                                       | -do-                            | -do-                             |
| Anti-Cleaved Caspase-3                           | -do-                            | -do-                             |
| Anti-E-cadherin                                  | BD Biosciences                  | San Jose, CA, USA                |
| Anti- $\beta$ Catenin                            | BD Biosciences                  | San Jose, CA, USA                |
| Anti-P-27                                        | Santa Cruz biotechnology Inc.   | Santa Cruz, CA, USA              |
| Anti-c-myc                                       | -do-                            | -do-                             |
| Anti-Cyclin D1                                   | -do-                            | -do-                             |
| Anti-Brdu                                        | BD Biosciences                  | San Jose, CA, USA                |
| Anti-Active Caspase-3                            | BD Biosciences                  | San Jose, CA, USA                |
| Brdu                                             | Sigma-Aldrich                   | St. Louis, MO, USA               |
| Anti- $\beta$ Actin                              | Sigma-Aldrich                   | St. Louis, MO, USA               |
| RNeasy Kit                                       | Qiagen                          | Valencia, Santa Clarita, CA, USA |
| Dextran Sodium Sulfate                           | MP Biomedicals                  | Solon, OH, USA                   |
| iScript cDNA synthesis kit                       | Bio-Rad                         | Hercules, California, USA        |
| 2 $\times$ iQ <sup>TM</sup> SYBR Green Supermix  | Bio-Rad                         | Hercules, California, USA        |
| MILLIPLEX MAP Mouse Cytokine/Chemokine Panel Kit | Millipore Corp.                 | Billerica, Massachusetts, USA    |
| FITC-labeled dextran                             | Sigma-Aldrich                   | St. Louis, MO, USA               |
| anti-mouse F4/80                                 | Invitrogen Corp.                | San Francisco, CA, USA).         |
| Streptavidin magnetic beads                      | BD Biosciences                  | San Jose, CA, USA                |
| Collagenase                                      | Sigma-Aldrich                   | St. Louis, MO, USA               |
| Dispase II                                       | Sigma-Aldrich                   | St. Louis, MO, USA               |
| 70- $\mu$ m cell strainer                        | BD Biosciences                  | San Jose, CA, USA                |
| Zeocin                                           | Invitrogen                      | Carlsbad, CA, USA                |
| Chemiluminescence                                | Amersham Biosciences            | Piscataway, NJ, USA              |

## Supplemental Table 2

Injury score Criteria:

| Inflammation (A)                                          | % involved by inflammation (B)                                    | Depth of inflammation (C)                                        | Crypt damage (D)                                                                                                      | % involved by crypt damage (E)                                    | Injury score     |
|-----------------------------------------------------------|-------------------------------------------------------------------|------------------------------------------------------------------|-----------------------------------------------------------------------------------------------------------------------|-------------------------------------------------------------------|------------------|
| 0-3<br>0 (None)<br>1 (Mild)<br>2 (Moderate)<br>3 (Severe) | 1-4<br>1 (1 to 25%)<br>2 (26 to 50%)<br>3 (51 to 75%)<br>4 (>75%) | 0-3<br>0 (None)<br>1 (Mucosa)<br>2 (Submucosa)<br>3 (Transmural) | 1-4<br>1 (Basal 1/3 damaged)<br>2 (Basal 2/3 damaged)<br>3 (Only surface intact)<br>4 (Entire crypt and surface lost) | 1-4<br>1 (1 to 25%)<br>2 (26 to 50%)<br>3 (51 to 75%)<br>4 (>75%) | $=(A+C)*B+(D*E)$ |

## Supplemental Table 3 (Real-time PCR primers)

| Gene   | Sense Primer                 | Antisense Primer            |
|--------|------------------------------|-----------------------------|
| Actin  | 5'-CCAGAGCAAGAGAGGTATCC-3'   | 5'-CTGTGGTGGTGAAGCTGTAG-3'  |
| KC     | 5'-GCTGGGATTCACCTCAAGAA-3'   | 5'-CTTGGGGACACCTTTTAGCA-3'  |
| TNF    | 5'-CTGTGAAGGGAATGGGTGTT-3'   | 5'-GGTCACTGTCCCAGCATCTT-3'  |
| IFN    | 5'-GCCACGGCACAGTCATTGAA-3'   | 5'-CGCCTTGCTGTTGCTGAAGA-3'  |
| IL-6   | 5'-AGAGACTTCCATCCAGTTGC-3'   | 5'-TCCTTAGCCACTCCTTCTGT-3'  |
| IL-10  | 5'-TAGAGCTGCGGACTGCCTTC-3'   | 5'-CTTCACCTGCTCCACTGCCT-3'  |
| TLR-2  | 5'-GCTGGAGGACTCCTAAGGCT-3'   | 5'-GTCAGAAGGAAACAGTCCGC-3'  |
| TLR-4  | 5'-ACCAGGAAGCTTGAATCCCT-3'   | 5'-TCCAGCCACTGAAGTTCTGA-3'  |
| MyD 88 | 5'-GAGCGTTTCGATGCCTTCAT-3'   | 5'-CGGATCATCTCCTGCACAAA-3'  |
| Ki67   | 5'-AGAAGACCTGCTACTCCAAAGA-3' | 5'-AGTTTGCGTGGCCTGTACTAA-3' |
| P21    | 5'-TGTCCGTCAGAACCCATGC-3'    | 5'-AAAGTCGAAGTTCCATCGCTC-3' |
